# Supplementary material for: Fluorescence assay for alkaline phosphatase based on ATP hydrolysis-triggered dissociation of cerium coordination polymer nanoparticles
Source: Royal Society of Chemistry journal article supplement (doi:10.1039/c8an00787j), 2018-01-01
Supplement: c8an00787j1.pdf [file c8an00787j1.pdf]

## Electronic Supplementary Information

*for*

### **Fluorescence assay for alkaline phosphatase based on ATP hydrolysis-triggered dissociation of cerium coordination polymer nanoparticles**

Chuanxia Chen,<sup>\*a</sup> Qun Yuan,<sup>b</sup> Pengjuan Ni,<sup>a</sup> Yuanyuan Jiang,<sup>a</sup> Zhenlu Zhao<sup>a</sup> and

Yizhong Lu<sup>\*a</sup>

<sup>a</sup> School of Materials Science and Engineering, University of Jinan, Jinan 250022,  
China

<sup>b</sup> Shandong Center for Disease Control and Prevention, Jinan 250014, China

\* Corresponding author.

*E-mail address:* mse\_chencx@ujn.edu.cn, mse\_luyz@ujn.edu.cn

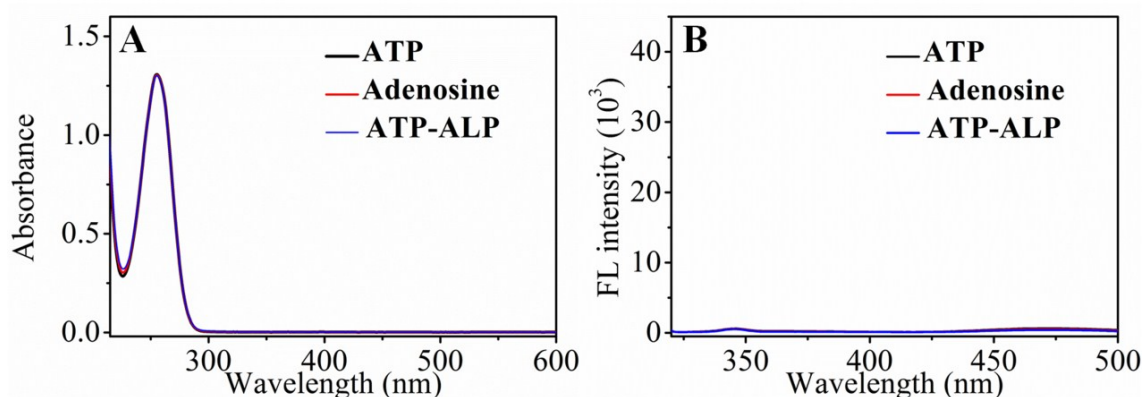

**Fig. S1** (A) UV-vis spectra and (B) fluorescence emission spectra monitoring ALP-mediated dephosphorylation reaction of ATP. There is no difference in the spectra between ATP (substrate) and adenosine (product). ATP: 0.1 mM, adenosine: 0.1 mM, ALP: 100 mU/mL.

**Table S1** quantum yield of the lanthanide cerium complex

| Sample          | Integrated emission intensity (I) | Abs. at 310 nm (A) | Refractive index of solvent ( $\eta$ ) | Quantum Yield <sup>*a</sup> |
|-----------------|-----------------------------------|--------------------|----------------------------------------|-----------------------------|
| Quinine sulfate | 4760469.5                         | 0.0311             | 1.33                                   | 0.54 (known)                |
| CPN sample      | 885662                            | 0.0466             | 1.33                                   | 0.067                       |

<sup>\*a</sup> The quantum yield of the CPNs was measured by comparing the integrated photoluminescence intensities and the optical densities with the reference quinine sulfate. The quinine sulfate (literature QY=0.54) was dissolved in 0.1 M H<sub>2</sub>SO<sub>4</sub> (refractive index ( $\eta$ ) of 1.33) and the CPNs was dissolved in ultrapure water ( $\eta$ =1.33).

$$QY = QY_R \times \frac{I}{I_R} \times \frac{A_R}{A} \times \frac{\eta^2}{\eta_R^2}$$

Where QY is the quantum yield,  $I$  is the measured integrated emission intensity,  $\eta$  is the refractive index, and  $A$  is the optical density. The subscript R refers to the reference fluorophore of known quantum yield.

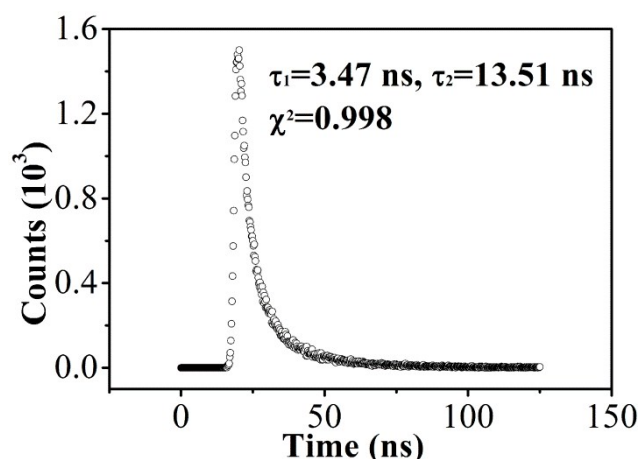

**Fig. S2** Time-resolved fluorescence decay spectrum of the lanthanide cerium complex.

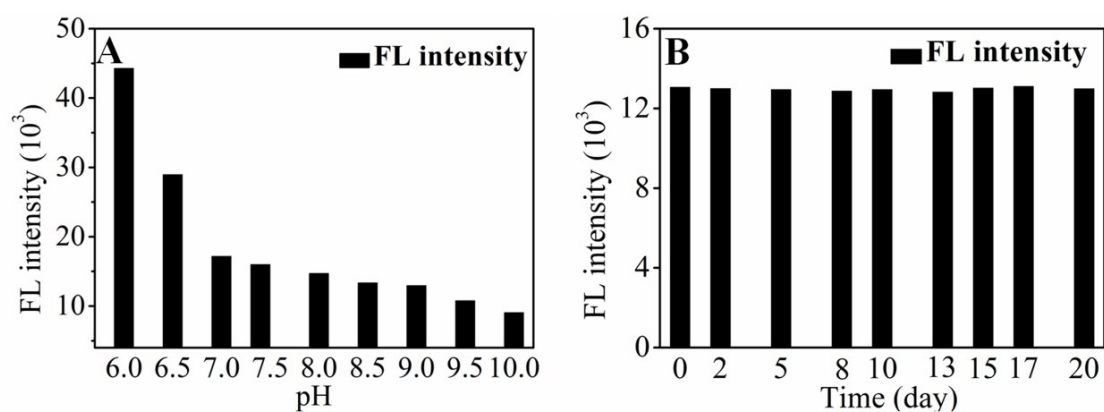

**Fig. S3** (A) Effect of pH value on the FL intensity of purified  $\text{Ce}^{3+}$ -ATP-Tris CPNs. (B) Fluorescence intensity of purified  $\text{Ce}^{3+}$ -ATP-Tris CPNs in 20 days.

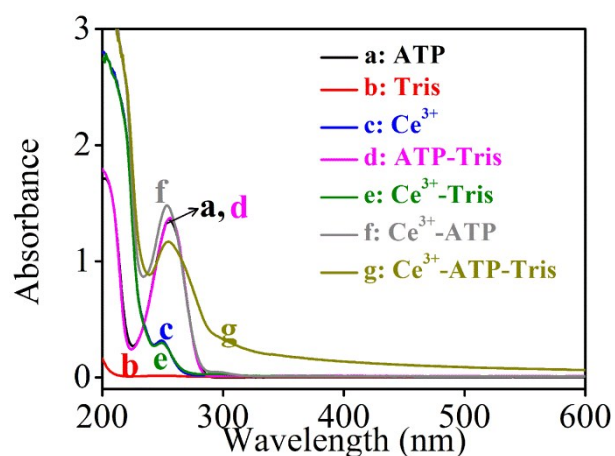

**Fig. S4** UV-vis absorption spectra of the ATP solution, Tris-HCl solution,  $\text{Ce}^{3+}$  solution, ATP-Tris solution,  $\text{Ce}^{3+}$ -Tris solution,  $\text{Ce}^{3+}$ -ATP solution and  $\text{Ce}^{3+}$ -ATP-Tris CPN solution. Cerium nitrate: 0.4 mM, ATP: 0.1 mM, Tris-HCl: 4 mM (pH 7.4).

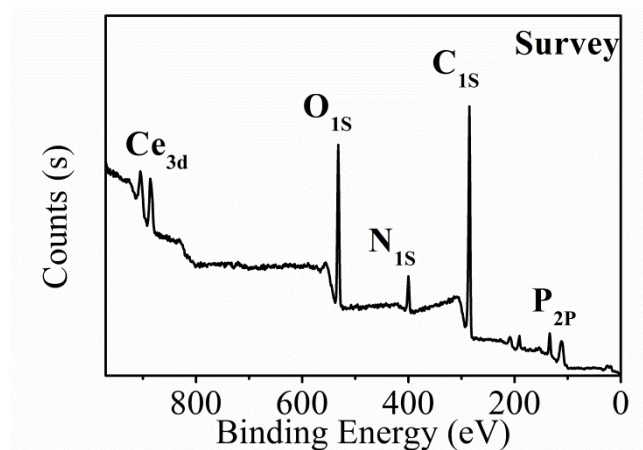

Fig. S5 XPS survey spectra of the as-prepared lanthanide cerium complex.

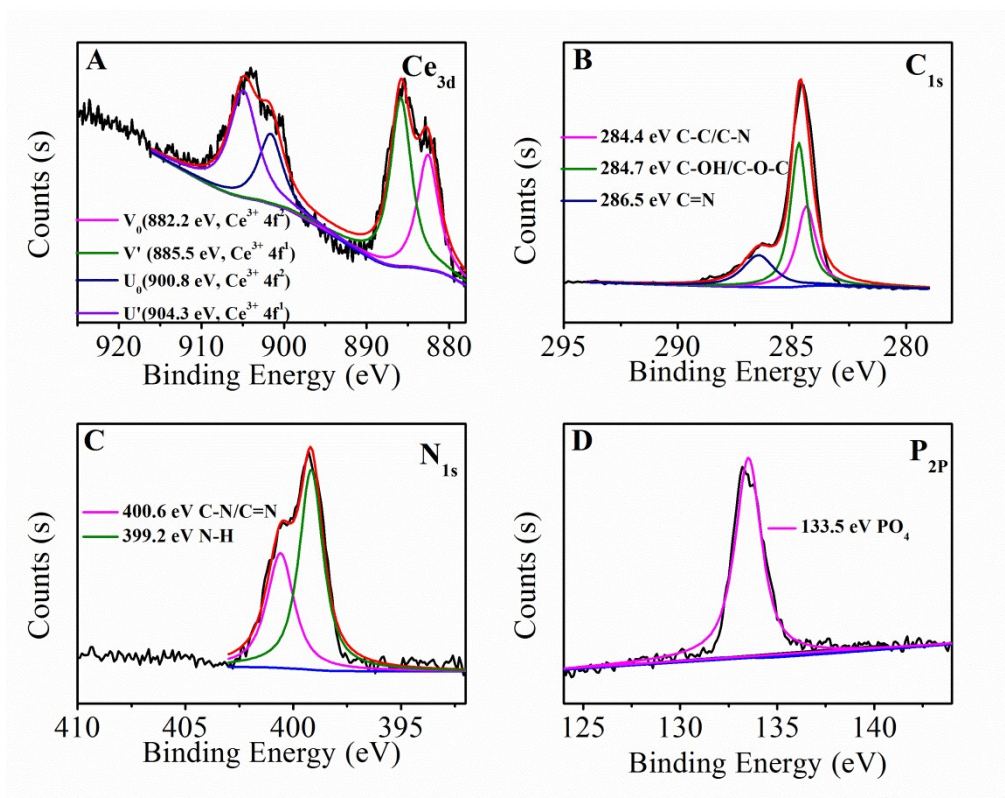

Fig. S6 High-resolution (A)  $Ce_{3d}$ ,  $C_{1s}$ ,  $N_{1s}$  and  $P_{2p}$  peaks of the lanthanide cerium complex.

**Table S2** Comparison of the current work with other reported methods for the detection of ALP

| Method            | Sensing system                       | LOD<br>(mU/mL) | Detection range<br>(mU/mL) | Ref.      |
|-------------------|--------------------------------------|----------------|----------------------------|-----------|
| Electrochemistry  | Ferrocene-based substrate            | 0.4            | 1–1000                     | 1         |
| Electrochemistry  | CdSe nanoparticles                   | 2              | 2–25                       | 2         |
| Chemiluminescence | CSPD substrate                       | 0.01           | 0.01–10                    | 3         |
|                   | AuNPs/ATP                            | 10             | 100–600                    |           |
| Colorimetry       | AuNPs/ATP/Ca <sup>2+</sup>           | 3.5            | 5–100                      | 4         |
|                   | AuNPs/ATP/Pb <sup>2+</sup>           | 0.1            | 0.2–20                     |           |
| Colorimetry       | AuNPs/ATP                            | 8000           | 8000–5×10 <sup>5</sup>     | 5         |
| Colorimetry       | AgNPs/ATP                            | 1000           | —                          | 6         |
| Colorimetry       | Redox active nanoceria               | 0.04           | 0.04–2                     | 7         |
| Colorimetry       | Cu-MOF/PPi                           | 0.19           | 1–34                       | 8         |
| Fluorometry       | PPECO <sub>2</sub> -Cu <sup>2+</sup> | ~20            | ~0–1200                    | 9         |
| Fluorometry       | Cu <sup>2+</sup> -DNA/AgNPs          | 0.005          | 0.03–3                     | 10        |
| Fluorometry       | AuNCs                                | 0.002          | 0.02–50                    | 11        |
| Fluorometry       | CdS QDs                              | 0.5            | 0–50                       | 12        |
| Fluorometry       | Chalcone derivative                  | 0.15           | 0–150                      | 13        |
| Fluorometry       | SiNPs                                | 0.2            | 0.2–30                     | 14        |
| Fluorometry       | Calcein-Ce <sup>3+</sup>             | 0.023          | 0.1–0.4, 0.4–1.2           | 15        |
| Fluorometry       | CoOOH/NGQDs                          | 0.07           | 0.1–5                      | 16        |
| Fluorometry       | Ce <sup>3+</sup> -ATP-Tris           | 0.09           | 0.1–10                     | This work |

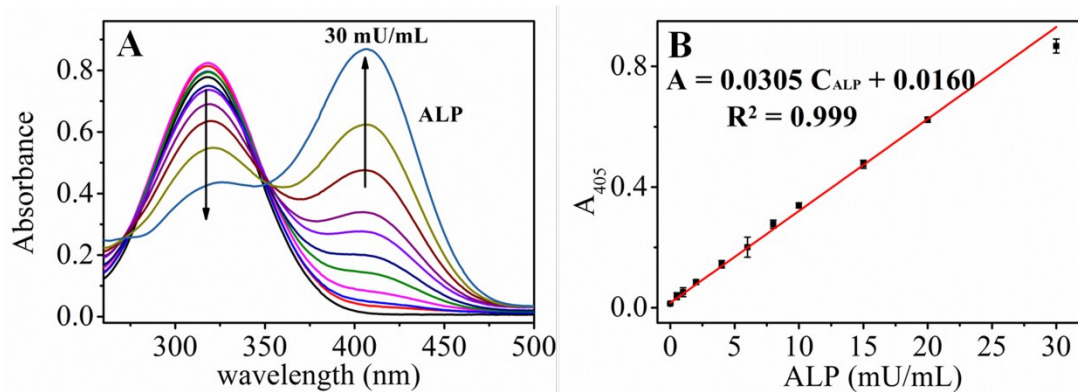

**Fig. S7** (A) The UV-vis absorption spectra of the standard pNPP-based colorimetric sensing system in the presence of different concentrations of ALP (0 to 30 mU/mL). (B) Calibration curve of ALP measured by the pNPP-based standard chromogenic method. The detection of ALP activities by pNPP-based standard chromogenic method was proceeded as follows. 200  $\mu$ L of ALP with different concentrations and 200  $\mu$ L of pNPP (5 mM) were successively added into 600  $\mu$ L of DEA-HCl buffer (1.0 M, 0.5 mM  $\text{MgCl}_2$ , pH 9.8). The solution was incubated at 37  $^\circ\text{C}$  for 30 min, and was subsequently terminated by adding 100  $\mu$ L of 2 M  $\text{Na}_2\text{CO}_3$ . The absorption spectra of the resulted solution were measured after being brought to room temperature for 20 min. The absorbance at 405 nm were recorded and analyzed.

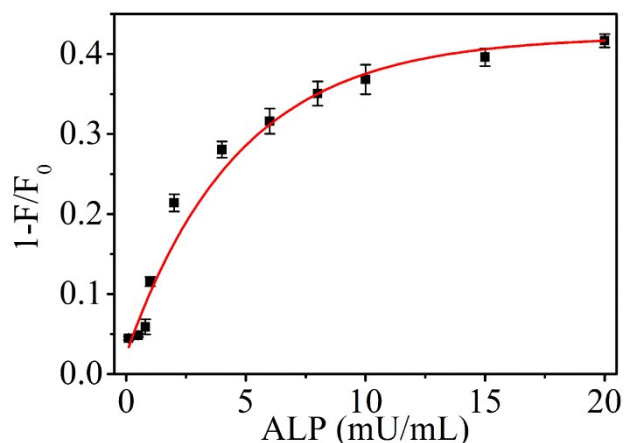

**Fig. S8** The calibration curve for ALP detection in diluted serum (5%). Error bars represent the standard deviations ( $n = 3$ ). Experimental conditions: 0.4 mM  $\text{Ce}^{3+}$ -ATP-Tris CPNs, pH 9.0 (10 mM Tris-HCl), 37  $^\circ\text{C}$ , 60 min.

## REFERENCE

- 1 S. Goggins, C. Naz, B. J. Marsh and C. G. Frost, *Chem. Commun.*, 2015, **51**, 561.
- 2 H. Jiang and X. Wang, *Anal. Chem.*, 2012, **84**, 6986.
- 3 J. S. Blum, R. H. Li, A. G. Mikos and M. A. Barry, *J. Cell. Biochem.*, 2001, **80**, 532.
- 4 C. M. Li, S. J. Zhen, J. Wang, Y. F. Li and C. Z. Huang, *Biosens. Bioelectron.*, 2013, **43**, 366.
- 5 W. Zhao, W. Chiuman, J. C. Lam, M. A. Brook and Y. Li, *Chem. Commun.*, 2007, DOI: 10.1039/b705335e, 3729.
- 6 H. Wei, C. Chen, B. Han and E. Wang, *Anal. Chem.*, 2008, **80**, 7051.

- 7 A. Hayat, B. Gonca and S. Andreescu, *Biosens. Bioelectron.*, 2014, **56**, 334.
- 8 C. Wang, J. Gao, Y. Cao and H. Tan, *Anal. Chim. Acta*, 2018, **1004**, 74.
- 9 Y. Liu and K. S. Schanze, *Anal. Chem.*, 2008, **80**, 8605.
- 10 J. L. Ma, B. C. Yin, X. Wu and B. C. Ye, *Anal. Chem.*, 2016, **88**, 9219.
- 11 H. Liu, M. Li, Y. Xia and X. Ren, *ACS Appl. Mater. Interfaces*, 2017, **9**, 120.
- 12 N. Malashikhina, G. Garai-Ibabe and V. Pavlov, *Anal. Chem.*, 2013, **85**, 6866.
- 13 Z. Song, R. T. K. Kwok, E. Zhao, Z. He, Y. Hong, J. W. Y. Lam, B. Liu and B. Z. Tang, *ACS Appl. Mater. Interfaces*, 2014, **6**, 17245.
- 14 J. Sun, T. Hu, C. Chen, D. Zhao, F. Yang and X. Yang, *Anal. Chem.*, 2016, **88**, 9789.
- 15 C. Chen, J. Zhao, Y. Lu, J. Sun and X. Yang, *Anal. Chem.*, 2018, **90**, 3505.
- 16 J. Liu, D. Tang, Z. Chen, X. Yan, Z. Zhong, L. Kang and J. Yao, *Biosens. Bioelectron.*, 2017, **94**, 271.
